# Supplementary material for: Characteristics and Relationships between Species Diversity and Productivity of Different Grassland Types in the Burqin Forest Region of the Altai Mountains
Source: MDPI journal article supplement (doi:10.3390/f14091829), 2023-09-07
Supplement: s1 [file s1]

Table S1-3 is ANOVA between number of plant families, genera and species in grassland types in Burqin region.

**Table S1:** ANOVA between number of plant families, genera and species in grassland types in Burqin region

|                |                | Sum of Squares | df | Mean Square | F     | Sig.  |
|----------------|----------------|----------------|----|-------------|-------|-------|
| <b>Family</b>  | Between Groups | 35.228         | 4  | 8.807       | 3.953 | 0.009 |
|                |                | 1.382          | 1  | 1.382       | 0.62  | 0.436 |
|                |                | 0.151          | 1  | 0.151       | 0.068 | 0.796 |
|                |                | 35.077         | 3  | 11.692      | 5.248 | 0.004 |
|                | Within Groups  | 80.201         | 36 | 2.228       |       |       |
|                | Total          | 115.428        | 40 |             |       |       |
| <b>Genus</b>   | Between Groups | 60.659         | 4  | 15.165      | 2.445 | 0.064 |
|                |                | 1.53           | 1  | 1.53        | 0.247 | 0.622 |
|                |                | 0.016          | 1  | 0.016       | 0.003 | 0.96  |
|                |                | 60.643         | 3  | 20.214      | 3.259 | 0.033 |
|                | Within Groups  | 223.317        | 36 | 6.203       |       |       |
|                | Total          | 283.976        | 40 |             |       |       |
| <b>Species</b> | Between Groups | 65.257         | 4  | 16.314      | 2.663 | 0.048 |
|                |                | 0.211          | 1  | 0.211       | 0.034 | 0.854 |
|                |                | 0.423          | 1  | 0.423       | 0.069 | 0.794 |
|                |                | 64.834         | 3  | 21.611      | 3.528 | 0.024 |
|                | Within Groups  | 220.548        | 36 | 6.126       |       |       |
|                | Total          | 285.805        | 40 |             |       |       |

**Table S2:** LSD Multiple Comparisons

| Dependent variable | (I) Different grassland types | (J) Different grassland types | Mean Difference (I-J) | Std. Error | Sig.  | 95% Confidence Interval for Mean |             |
|--------------------|-------------------------------|-------------------------------|-----------------------|------------|-------|----------------------------------|-------------|
|                    |                               |                               |                       |            |       | Lower Bound                      | Upper Bound |
| <b>Family</b>      | DS                            | MS                            | -2.722*               | 0.931      | 0.006 | -4.6099                          | -0.8345     |
|                    |                               | MMS                           | -2.056*               | 0.931      | 0.034 | -3.9433                          | -0.1678     |
|                    |                               | MM                            | 0.368                 | 0.532      | 0.493 | -0.7107                          | 1.4467      |
|                    |                               | AM                            | -0.722                | 0.931      | 0.443 | -2.6099                          | 1.1655      |
|                    | MS                            | DS                            | 2.722*                | 0.931      | 0.006 | 0.8345                           | 4.6099      |
|                    |                               | MMS                           | 0.667                 | 1.219      | 0.588 | -1.8049                          | 3.1383      |
|                    |                               | MM                            | 3.09*                 | 0.95       | 0.002 | 1.1644                           | 5.0161      |
|                    |                               | AM                            | 2                     | 1.219      | 0.109 | -0.4716                          | 4.4716      |
|                    | MMS                           | DS                            | 2.056*                | 0.931      | 0.034 | 0.1678                           | 3.9433      |
|                    |                               | MS                            | -0.667                | 1.2186     | 0.588 | -3.1383                          | 1.8049      |
|                    | MM                            | MM                            | 2.424*                | 0.9495     | 0.015 | 0.4977                           | 4.3494      |
|                    |                               | AM                            | 1.333                 | 1.2186     | 0.281 | -1.1383                          | 3.8049      |
|                    |                               | DS                            | -0.368                | 0.5318     | 0.493 | -1.4467                          | 0.7107      |

|       |     |     |         |             |       |         |         |
|-------|-----|-----|---------|-------------|-------|---------|---------|
| Genus | AM  | MS  | -3.09*  | 0.9495<br>9 | 0.002 | -5.0161 | -1.1644 |
|       |     | MMS | -2.424* | 0.9495<br>9 | 0.015 | -4.3494 | -0.4977 |
|       |     | AM  | -1.09   | 0.9495<br>9 | 0.258 | -3.0161 | 0.8356  |
|       |     | DS  | 0.722   | 0.9307<br>9 | 0.443 | -1.1655 | 2.6099  |
|       |     | MS  | -2      | 1.2186<br>9 | 0.109 | -4.4716 | 0.4716  |
|       |     | MMS | -1.333  | 1.2186<br>9 | 0.281 | -3.8049 | 1.1383  |
|       | DS  | MM  | 1.09    | 0.9495<br>9 | 0.258 | -0.8356 | 3.0161  |
|       |     | MS  | -2.652  | 1.5531<br>8 | 0.096 | -5.8017 | 0.4983  |
|       |     | MMS | -1.652  | 1.5531<br>8 | 0.295 | -4.8017 | 1.4983  |
|       |     | MM  | 0.92    | 0.8875<br>3 | 0.307 | -0.8802 | 2.7198  |
|       |     | AM  | -2.652  | 1.5531<br>8 | 0.096 | -5.8017 | 0.4983  |
|       |     | DS  | 2.652   | 1.5531<br>8 | 0.096 | -0.4983 | 5.8017  |
|       | MS  | MMS | 1       | 2.0335<br>9 | 0.626 | -3.1243 | 5.1243  |
|       |     | MM  | 3.57*   | 1.5845<br>6 | 0.03  | 0.3578  | 6.7851  |
|       |     | AM  | 0       | 2.0335<br>9 | 1     | -4.1243 | 4.1243  |
|       |     | DS  | 1.652   | 1.5531<br>8 | 0.295 | -1.4983 | 4.8017  |
|       |     | MS  | -1      | 2.0335<br>9 | 0.626 | -5.1243 | 3.1243  |
|       |     | MM  | 2.571*  | 1.5845<br>6 | 0.046 | -0.6422 | 5.7851  |
|       | MMS | AM  | -1      | 2.0335<br>9 | 0.626 | -5.1243 | 3.1243  |
|       |     | DS  | -0.92   | 0.8875<br>3 | 0.307 | -2.7198 | 0.8802  |
|       |     | MS  | -3.57*  | 1.5845<br>6 | 0.03  | -6.7851 | -0.3578 |
|       |     | MMS | -2.571* | 1.5845<br>6 | 0.028 | -5.7851 | 0.6422  |
|       |     | AM  | -3.571* | 1.5845<br>6 | 0.03  | -6.7851 | -0.3578 |
|       |     | DS  | 2.652   | 1.5531<br>8 | 0.096 | -0.4983 | 5.8017  |
|       | MM  | MS  | 0       | 2.0335<br>9 | 1     | -4.1243 | 4.1243  |
|       |     | MMS | 1       | 2.0335      | 0.626 | -3.1243 | 5.1243  |

|         |     |     |         |        |       |         |         |
|---------|-----|-----|---------|--------|-------|---------|---------|
| Species | DS  |     |         | 9      |       |         |         |
|         |     | MM  | 3.571*  | 1.5845 | 0.03  | 0.3578  | 6.7851  |
|         |     |     |         | 6      |       |         |         |
|         |     | MS  | -3      | 1.5435 | 0.06  | -6.1304 | 0.1304  |
|         |     |     |         | 2      |       |         |         |
|         |     | MMS | -1.667  | 1.5435 | 0.287 | -4.7971 | 1.4637  |
|         | MS  |     |         | 2      |       |         |         |
|         |     | MM  | 1.024   | 0.8820 | 0.253 | -0.765  | 2.8126  |
|         |     |     |         | 1      |       |         |         |
|         |     | AM  | -2.333  | 1.5435 | 0.139 | -5.4637 | 0.7971  |
|         |     |     |         | 2      |       |         |         |
|         |     | DS  | 3       | 1.5435 | 0.06  | -0.1304 | 6.1304  |
|         | MMS |     |         | 2      |       |         |         |
|         |     | MMS | 1.333   | 2.0209 | 0.514 | -2.7653 | 5.432   |
|         |     |     |         | 4      |       |         |         |
|         |     | MM  | 4.024*  | 1.5747 | 0.015 | 0.8302  | 7.2175  |
|         |     |     |         | 1      |       |         |         |
|         |     | AM  | 0.667   | 2.0209 | 0.743 | -3.432  | 4.7653  |
|         | MM  |     |         | 4      |       |         |         |
|         |     | DS  | 1.667   | 1.5435 | 0.287 | -1.4637 | 4.7971  |
|         |     |     |         | 2      |       |         |         |
|         |     | MS  | -1.333  | 2.0209 | 0.514 | -5.432  | 2.7653  |
|         |     |     |         | 4      |       |         |         |
|         |     | MM  | 2.691   | 1.5747 | 0.096 | -0.5032 | 5.8841  |
|         | AM  |     |         | 1      |       |         |         |
|         |     | AM  | -0.667  | 2.0209 | 0.743 | -4.7653 | 3.432   |
|         |     |     |         | 4      |       |         |         |
|         |     | DS  | -1.024  | 0.8820 | 0.253 | -2.8126 | 0.765   |
|         |     |     |         | 1      |       |         |         |
|         |     | MS  | -4.024* | 1.5747 | 0.015 | -7.2175 | -0.8302 |
|         |     |     |         | 1      |       |         |         |
|         |     | MMS | -2.691  | 1.5747 | 0.096 | -5.8841 | 0.5032  |
|         |     |     |         | 1      |       |         |         |
|         |     | AM  | -3.357* | 1.575  | 0.04  | -6.5508 | -0.1635 |
|         |     |     |         | 1      |       |         |         |
|         |     | DS  | 2.333   | 1.544  | 0.139 | -0.797  | 5.464   |
|         |     | MS  | -0.667  | 2.02   | 0.743 | -4.765  | 3.432   |
|         |     | MMS | 0.667   | 2.021  | 0.743 | -3.432  | 4.77    |
|         |     | MM  | 3.357*  | 1.575  | 0.04  | 0.163   | 6.551   |

\* The mean difference is significant at the 0.05 level.

**Table S3:** Descriptives

| Score  |     | N  | Mean   | Std. Deviation | Std. Error | 95% Confidence Interval for Mean |             | Minimum | Maximum |
|--------|-----|----|--------|----------------|------------|----------------------------------|-------------|---------|---------|
|        |     |    |        |                |            | Lower Bound                      | Upper Bound |         |         |
| Family | DS  | 18 | 3.9444 | 1.39209        | 0.32812    | 3.252                            | 4.637       | 2       | 8       |
|        | MS  | 3  | 6.6667 | 0.57735        | 0.33333    | 5.232                            | 8.101       | 6       | 7       |
|        | MMS | 3  | 6      | 1.73205        | 1          | 1.697                            | 10.302      | 4       | 7       |

|                |           |    |        |         |         |        |        |   |    |
|----------------|-----------|----|--------|---------|---------|--------|--------|---|----|
| <b>Genus</b>   | MM        | 14 | 3.5764 | 1.56704 | 0.41881 | 2.671  | 4.481  | 2 | 8  |
|                | AM        | 3  | 4.6667 | 2.08167 | 1.20185 | -0.505 | 9.838  | 3 | 7  |
|                | Total     | 41 | 4.2212 | 1.69874 | 0.2653  | 3.685  | 4.757  | 2 | 8  |
|                | DS        | 18 | 5.3483 | 1.90801 | 0.44972 | 4.4    | 6.3    | 2 | 10 |
|                | MS        | 3  | 8      | 0       | 0       | 8      | 8      | 8 | 8  |
|                | MMS       | 3  | 7      | 1.73205 | 1       | 2.697  | 11.303 | 5 | 8  |
|                | MM        | 14 | 4.4286 | 3.29835 | 0.88152 | 2.524  | 6.333  | 2 | 12 |
| <b>Species</b> | AM        | 3  | 8      | 2.64575 | 1.52753 | 1.428  | 14.572 | 5 | 10 |
|                | Tot<br>al | 41 | 5.5432 | 2.66447 | 0.41612 | 4.702  | 6.384  | 2 | 12 |
|                | DS        | 18 | 5.6667 | 2.11438 | 0.49836 | 4.615  | 6.718  | 2 | 10 |
|                | MS        | 3  | 8.6667 | 1.1547  | 0.66667 | 5.798  | 11.535 | 8 | 10 |
|                | MMS       | 3  | 7.3333 | 1.1547  | 0.66667 | 4.465  | 10.202 | 6 | 8  |
|                | MM        | 14 | 4.6429 | 3.17701 | 0.84909 | 2.809  | 6.477  | 3 | 12 |
|                | AM        | 3  | 8      | 2       | 1.1547  | 3.032  | 12.968 | 6 | 10 |
|                | Total     | 41 | 5.829  | 2.673   | 0.418   | 4.986  | 6.673  | 2 | 12 |
